# Supplementary material for: Genome-wide association mapping of agronomic and quality traits in foxtail millet
Source: Research Square preprint supplement (doi:10.21203/rs.3.rs-1421666/v1), 2022-03-15
Supplement: Supplementary file 1 [file 60fce721b6edda377d6dd574.xlsx]

## Sheet: Table S4
Trait	Chrom	pos	maf	ref	Alt	Hom_ref_med	Het_med	Hom_Alt_med	favorable genotype
Kernel length	NC_028455.1	9309313	0.064	C	T	1.58	1.4	NA	Ref
Amylosel content	NC_028453.1	37973611	0.122	A	G	18.31	18.075	20.555	Alt
Amylosel content	NC_028453.1	37973645	0.126	A	G	18.31	18.29	20.555	Alt
Amylosel content	NC_028453.1	37988835	0.086	G	C	18.29	20.2	20.96	Alt
Amylosel content	NC_028453.1	37994843	0.108	T	G	18.33	18.29	20.91	Alt
Amylosel content	NC_028456.1	30034507	0.092	C	T	18.13	20.135	19.75	Het
Amylosel content	NC_028457.1	34069420	0.136	A	C	18.25	18.45	19.6	Alt
Chlorophyll SPD value	NC_028456.1	7613970	0.192	A	G	45.28	50.54	40.575	Het
Spike length	NC_028450.1	3848010	0.167	C	T	17.67	19.94	20.58	Alt
Spike length	NC_028450.1	3848023	0.167	G	A	17.67	19.94	20.58	Alt
Spike length	NC_028450.1	3848043	0.165	C	T	17.575	19.94	20.58	Alt
Spike length	NC_028450.1	3848044	0.165	G	A	17.575	19.94	20.58	Alt
Spike length	NC_028450.1	3848077	0.161	T	C	17.7	20.66	20.58	Het
Spike length	NC_028451.1	1472411	0.151	G	A	17.745	19.87	22.48	Alt
Spike length	NC_028455.1	5051410	0.265	G	T	17.565	19.59	18.42	Het
Spike width	NC_028452.1	2908604	0.085	T	A	29.0451	22.6011	17.3241	Ref
Spike width	NC_028458.1	24869880	0.205	A	G	28.5293	30.1322	26.9001	Het
Trough viscosity	NC_028451.1	39579719	0.211	G	A	1093	855.5	839.5	Ref
Trough viscosity	NC_028452.1	13868887	0.132	C	G	1045	1066	1197	Alt
Trough viscosity	NC_028452.1	26034327	0.068	C	T	1091.5	915.5	NA	Ref
Trough viscosity	NC_028452.1	26034574	0.058	C	A	1068.5	915.5	NA	Ref
Trough viscosity	NC_028452.1	26034598	0.057	G	A	1071	915.5	NA	Ref
Trough viscosity	NC_028457.1	25082093	0.432	G	A	1025	1047	1117	Alt
Trough viscosity	NC_028457.1	25082195	0.404	G	A	1025	1049	1119	Alt
Peak viscosity	NC_028450.1	40902365	0.311	C	A	1318	1036	1291	Ref
Peak viscosity	NC_028457.1	25082093	0.432	G	A	1201	1268.5	1356	Alt
Plant height	NC_028456.1	12307589	0.299	A	G	69.5	80.92	93.36	Alt
Plant height	NC_028456.1	12307615	0.293	T	C	69.63	80.92	93.62	Alt
Stem diameter	NC_028450.1	24889040	0.371	C	T	6.99333	8.06667	8.42722	Alt
Stem diameter	NC_028451.1	3222212	0.457	C	A	7.11189	7.50111	8.42722	Alt
Stem diameter	NC_028457.1	27405063	0.317	A	G	7.08267	8.02889	9.70267	Alt
Peak time	NC_028452.1	49395214	0.177	A	G	5.27	5.33	5.4	Alt
Peak time	NC_028452.1	49395338	0.175	T	C	5.27	5.365	5.4	Alt
Peak time	NC_028452.1	49395382	0.177	A	G	5.27	5.33	5.4	Alt
Peak time	NC_028452.1	49395392	0.177	T	C	5.27	5.33	5.4	Alt
Peak time	NC_028453.1	6863540	0.307	A	G	5.33	5.235	5.4	Alt
Peak time	NC_028453.1	6863543	0.307	C	T	5.33	5.235	5.4	Alt
Peak time	NC_028456.1	268493	0.214	T	C	5.27	5.33	5.4	Alt
Peak time	NC_028456.1	6731316	0.237	G	C	5.27	5.43	5.4	Het
Peak time	NC_028456.1	11077042	0.214	A	G	5.27	5.43	5.4	Het
Peak time	NC_028457.1	20500429	0.16	A	G	5.27	5.33	5.4	Alt
Peak time	NC_028458.1	19868245	0.294	T	C	5.27	5.4	5.4	Het;Alt
Peak time	NC_028458.1	19868257	0.294	T	C	5.27	5.4	5.4	Het;Alt
Peak time	NC_028458.1	19868477	0.294	A	G	5.27	5.4	5.4	Het;Alt
Peak time	NC_028458.1	19868528	0.294	A	G	5.27	5.4	5.4	Het;Alt
Breakdown value	NC_028453.1	3513088	0.399	A	C	323	203	190.5	Ref
Breakdown value	NC_028455.1	9299254	0.091	G	C	188	338	NA	Het
